# Supplementary material
Source: Springer Nature journal article supplement (https://www.springermedizin.de/resource/supplementary/12955_2007_399_MOESM1_ESM.pdf/9560324)
Supplement: MOESM1 [file 9560324]

No chronic condition  
( $n = 2,957$ )

Reference group in all analyses.

One or more selected  
chronic conditions<sup>1</sup>  
( $n = 19,475$ )

Musculoskeletal disorders ( $n = 12,858$ ): arthritis or rheumatism, fibromyalgia, or back problems.

Respiratory disorders ( $n = 3,106$ ): asthma, chronic bronchitis, COPD.

Cardiovascular disorders ( $n = 12,030$ ): high blood pressure or heart disease.

Diabetes ( $n = 3,135$ ).

Urinary or bowel problems ( $n = 2,790$ ): urinary incontinence, Crohn's disease, or colitis.

"Suffering from the effects of a stroke" ( $n = 1,139$ ).

One or more other chronic  
conditions<sup>2</sup> ( $n = 1,809$ ) or  
missing response ( $n = 40$ )

Excluded from all analyses ( $n = 1,849$ ).
